# Supplementary material for: Comparative genomics provides new insights into the diversity, physiology, and sexuality of the only industrially exploited tremellomycete: Phaffia rhodozyma
Source: PubMed Central journal article supplement (PMC5103461; doi:10.1186/s12864-016-3244-7), 2016-11-09
Supplement: 12864_2016_3244_MOESM5_ESM.pdf [file 12864_2016_3244_MOESM5_ESM.pdf]

a

### HD1

Pharho - PSSFRHLRDWFIVHLDHPYPSAQEKEELALARNLTKNSINLWFNNMRRRSGWM  
Kwohev - EPDHSLIRIWFLHNISYPYPTVSMKEHLASKAGITRAKVDSDLTNFRRRAGWT  
... :\* \*\*: :::\*\*\*\*:.. \*\*.\* \* ..\*: .:: :.\*:\*\*\*\*:\*\*  
Helix 1 Helix 2 Helix 3

### HD2

Pharho - SDDEQAPVSVRRSSFTKNTIDTLQALYDLNQYPNPIELKTIQAVKVGLOPKQIRAWFQNRNRRS  
Kwohev - VSQAASPR--KLSSFSTRSLLVLDAAYSRSKLSQAETVIAQAAGISPHQVRTWFQNKRRNGK  
. : :\* : \*\*\*:..::: .:\* \* . : . \* \*\* .\*:.\*:\*\*\*\*:\*\*\*\*.\*  
Helix 1 Helix 2 Helix 3

b

### Ste3-1

MKD**AIFPVFASIALLLLVLS**CYPHFRTGN **IGAIALVAVCFASNFVYLV**DC  
LIYWDTVENLTPVWCD**IMVKIQATTQTGLAAACL**CINRRRLAIISCSKQTS  
ATSKSRRW**AFWSDIMICVLAPVIVAVVSYCV**QSHRYNIVENFGCSGSPWM  
DYYAILGLHGSP**VLLGAISFVYGAIYNFIA**QRRRFQVVLQQNSSLNTS  
RFVRL**LIGVAGVNIVISLLFAIRETVLTA**HSVYPTVSWDYIHYDFDLVFTY  
DSFFLLGDPQAWVE**LNLSRWLPCVASFIYFAFFG**MHEDMLSYYTYVWARL  
SQALLRTKERIFGQPLTVHDPSQYPKLGTAVASPSECGWSQDKISDEEQV  
FPHSRTEISEKSNIDEGSLPRFEKICL

### Ste3-2

MRD**ALFPIYSGLAILLMLMACG**PHVRARNV**GAISLMTWCMLANITYFINA**  
**LVYQNTAEDLTPIWCDVVVKIQCAVQTGLAASCL**CINRRRLATISSPTQSR  
QTETSRQW**AFWSDVAICLLPTTLVLIV**SYCVQAHRYNIVENFGCFPATWL  
ELY**AILGLFVPPILCAAGSFICGGFAI**YNFLAQRFRFQAVLQQHSSSLNS  
SRFLR**LIGVAAVDMVLSLPGIY**EIIHNSYNLQPTYSWADLHHSFDLVQE  
TDQSILNAQPGSWASINLSRWTTT**LAAFIYFAFFGMHEDALSFASTW**NK  
ITAAFSYIWMRAFGTSEPPSYDSSHLTELGTTVASVSDLNRFCKSSKDEE  
AYFAYENMIGSDKSDSKGVDSKISVTVRIQKTIS
